# Supplementary material
Source: PubMed Central journal article supplement (PMC6646222)
Supplement: ao8b01296_si_001.pdf [file ao8b01296_si_001.pdf]

Supporting Information

An In-Situ Immobilized Sesamol-Quinone/Carbon  
Nanoblack based Electrochemical Redox Platform  
for an Efficient Bioelectrocatalytic and  
Immunosensor Applications

Mansi Gandhi,<sup>a</sup> Desikan Rajagopal,<sup>\*a,e</sup> Sampath Parthasarathy<sup>e</sup>, Sudhakaran Raja,<sup>d</sup>  
Sheng-Tung Huang,<sup>c</sup> Annamalai Senthil Kumar<sup>\*a,b,c</sup>

<sup>a</sup>*Nano and Bioelectrochemistry Research Laboratory, Department of Chemistry,  
School of Advanced Sciences, Vellore Institute of Technology, Vellore-632014, India*

<sup>b</sup>*Carbon dioxide Research and Green Technology Centre,*

*Vellore Institute of Technology, Vellore-632014, Tamil Nadu, India*

<sup>c</sup>*Institute of Biochemical and Biomedical Engineering, National Taipei University of  
Technology, Taipei, 10608, Taiwan, ROC*

<sup>d</sup>*Aquaculture Biotechnology Laboratory, Department of Integrative Biology, School of  
Biosciences and Technology, Vellore Institute of Technology, Vellore-632014, Tamil Nadu, India*

<sup>e</sup>*Burnett School of Biomedical Sciences, College of Medicine, University of Central Florida,  
Orlando, FL 32827, USA*

Table S1. Sesamol sample analyses for various sesame products like seeds and oils employing GCE/CB as a electrochemical detector by following the standard addition approach.

| Real Sample      | Detected/ $\mu\text{M}$ |         | Recovery |         | Total-content<br>(mg/100g) |
|------------------|-------------------------|---------|----------|---------|----------------------------|
|                  | A1 peak                 | A2 peak | A1 peak  | A2 peak |                            |
| 1. Seed White #1 | 39.1                    | --      | 96.0     | --      | 352                        |
|                  |                         | --      | 98.7     | --      |                            |
|                  |                         | --      | 99.7     | --      |                            |
| 2. Seed Black #2 | 113.3                   | --      | 95.0     | --      | 659                        |
|                  |                         | --      | 94.8     | --      |                            |
|                  |                         | --      | 92.1     | --      |                            |
| 3. Sesame oil #3 | 29                      | 30      | 102      | 98.5    | 274.6                      |
|                  |                         |         | 99.3     | 102.4   |                            |
|                  |                         |         | 97.8     | 97.7    |                            |
| 4. Sesame oil #4 | 12.4                    | 10.9    | 95       | 96      | 213                        |
|                  |                         |         | 98       | 102     |                            |
|                  |                         |         | 97       | 97.7    |                            |
|                  |                         |         | 93       | 99      |                            |
| 5. Sesame oil #5 | 11.2                    | 12.0    | 99.2     | 95.5    | 278                        |
|                  |                         |         | 98       | 92      |                            |
|                  |                         |         | 101      | 101.8   |                            |
